# Supplementary material for: High-throughput DNA analysis shows the importance of methylation in the control of immune inflammatory gene transcription in chronic periodontitis
Source: PubMed Central journal article supplement (PMC4140141; doi:10.1186/1868-7083-6-15), 2014-08-12

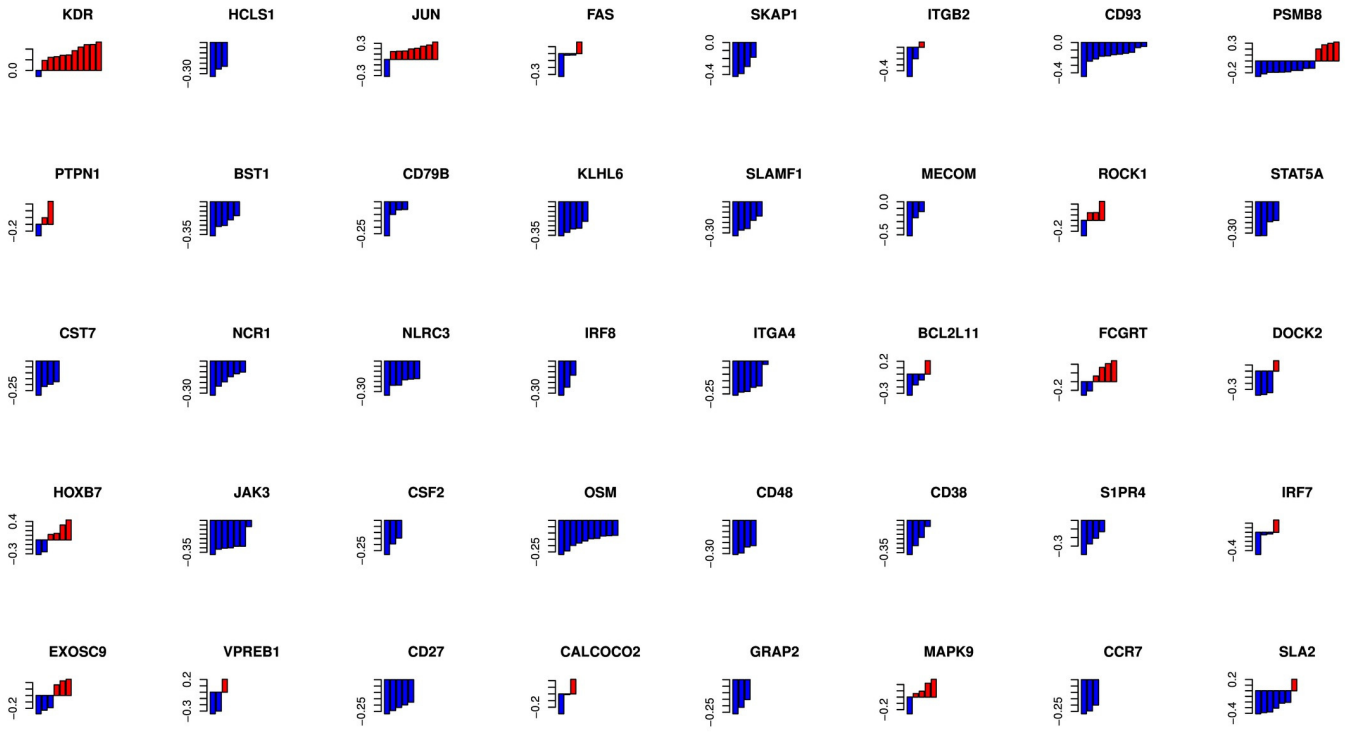

Supplement: 1868-7083-6-15-S2.pdf [file 1868-7083-6-15-S2.pdf]
